# Supplementary material for: Restrictive versus liberal red cell transfusion strategies in patients with acute myocardial infarction: a systematic review and meta-analysis
Source: Research Square preprint supplement (doi:10.21203/rs.3.rs-476215/v1), 2021-05-07

**SPPLEMENTAL MATERIAL**

[Definition 1](#_Toc1753)

[Figure S1 Results of quality assessment using the Cochrane Collaboration’s risk of bias tool (Randomized Controlled Trial) 2](#_Toc9635)

[Figure S2 Forest plot for the association between blood transfusion strategies with in-hospital and follow-up mortality 3](#_Toc24823)

[Figure S3 Funnel plot analysis of potential publication bias 4](#_Toc19605)

[Figure S4 A leave-one-out sensitivity analysis of this meta-analysis 5](#_Toc17114)

# Definition

- 1. **All-cause mortality:** All of the deaths that occur in the included population, regardless of the cause.
  2. **Overall mortality:** It includes in-hospital all-cause mortality and follow-up all-cause mortality.
  3. **In-hospital mortality:** All-cause mortality during hospitalization.
  4. **Follow-up mortality:** All-cause mortality during the follow-up period.
  5. **Major adverse cardiovascular events (MACEs):** MACEs is defined as a composite of reinfarction, stroke, heart failure, and emergency repeated percutaneous coronary intervention.
  6. **In-hospital MACEs:** MACEs during hospitalization.
  7. **Follow-up MACEs:** MACEs during the follow-up period.

# Figure S1 Results of quality assessment using the Cochrane Collaboration’s risk of bias tool (Randomized Controlled Trial)

**
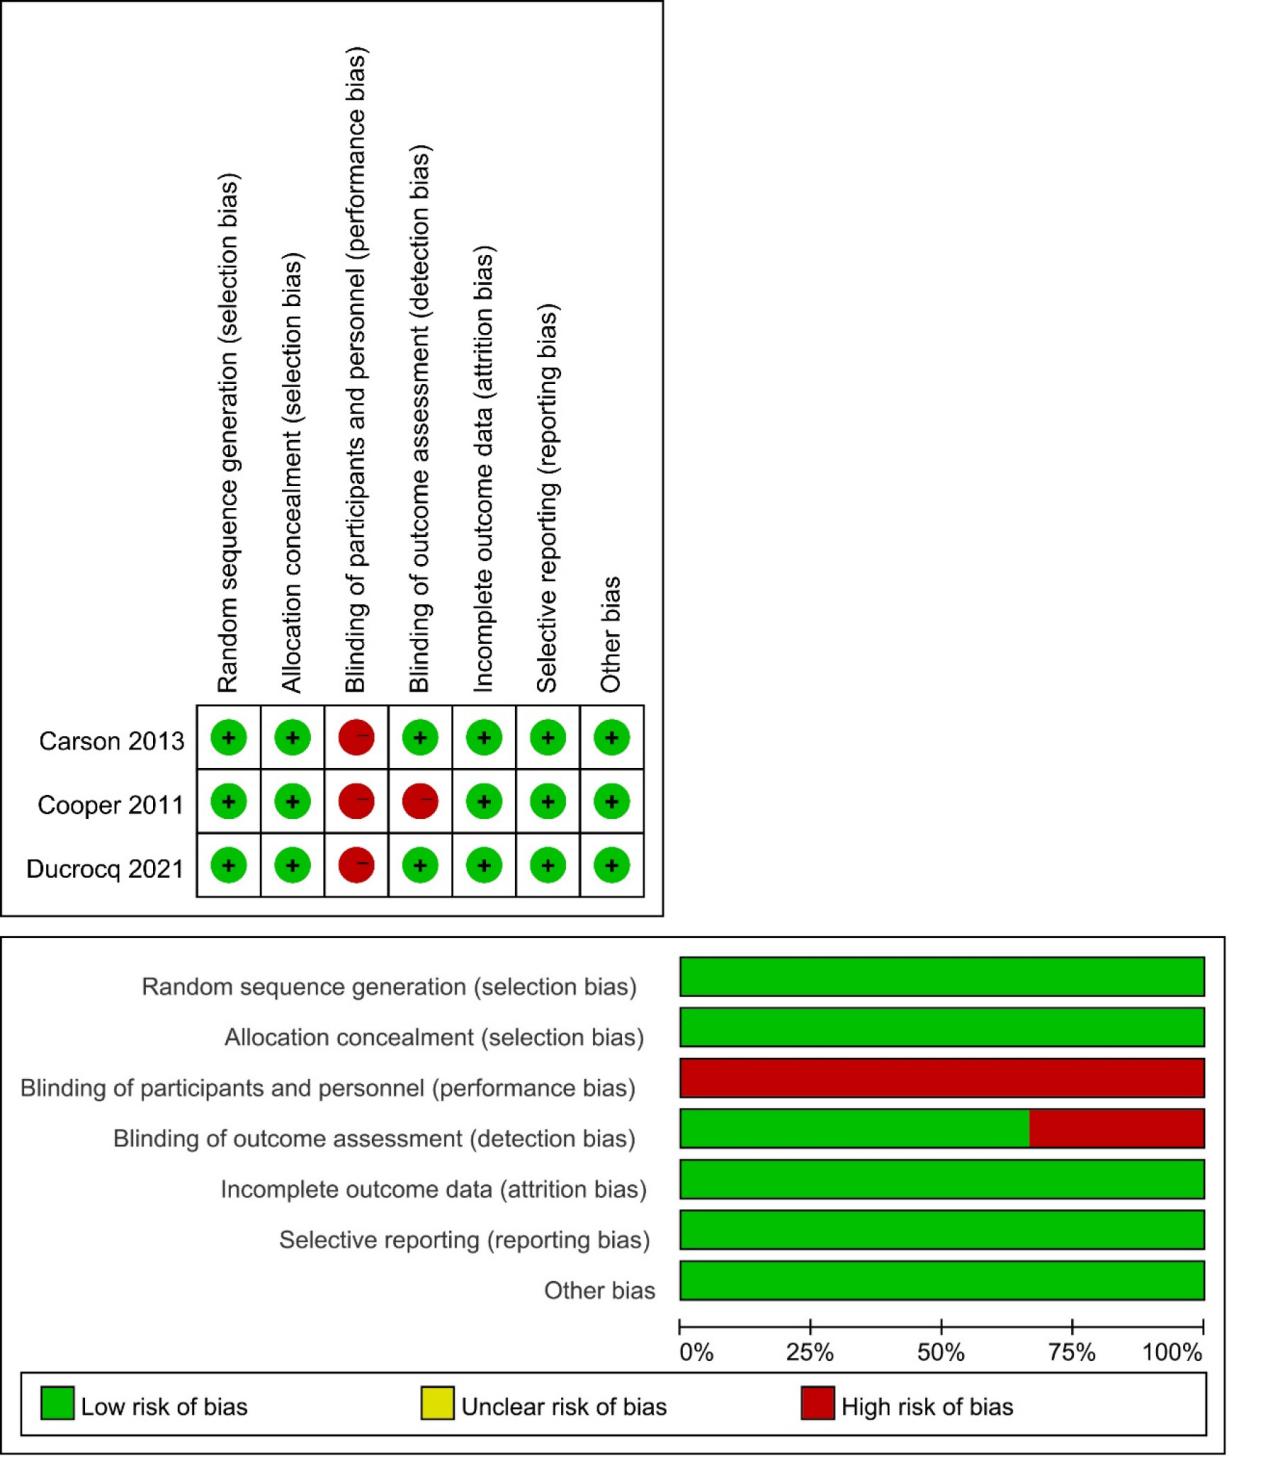
**

# Figure S2 Forest plot for the association between blood transfusion strategies with in-hospital and follow-up mortality


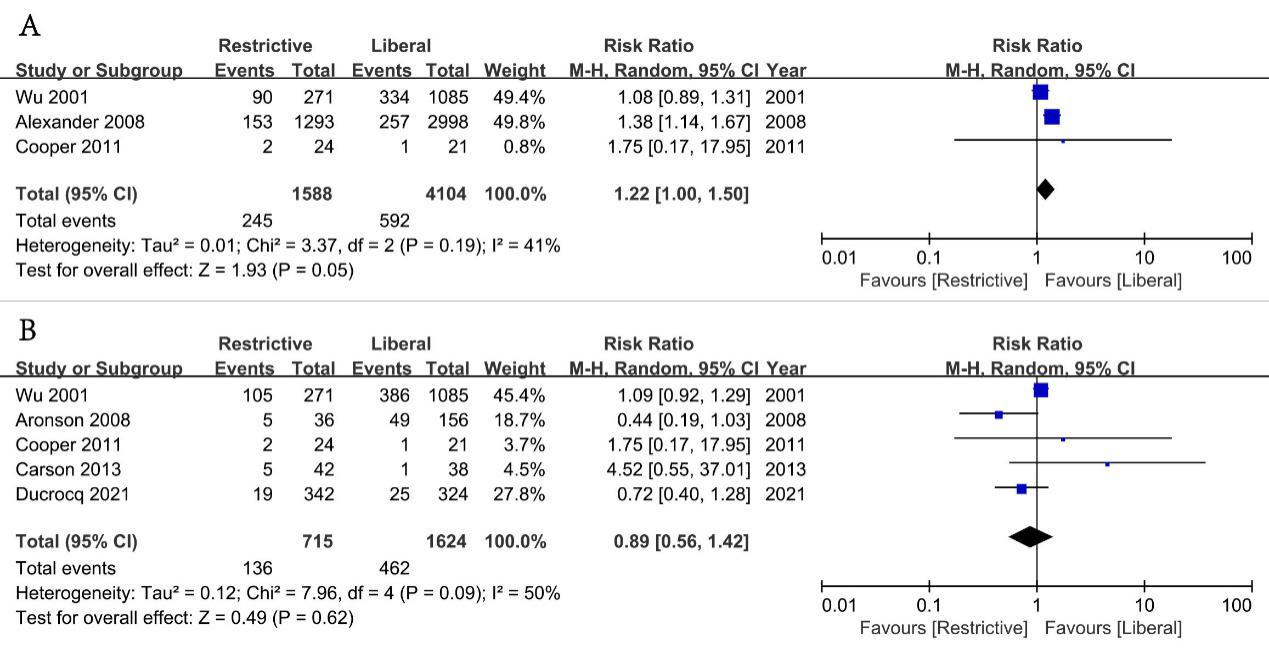


A: In- hospital mortality; B: Follow-up mortality

# Figure S3 Funnel plot analysis of potential publication bias


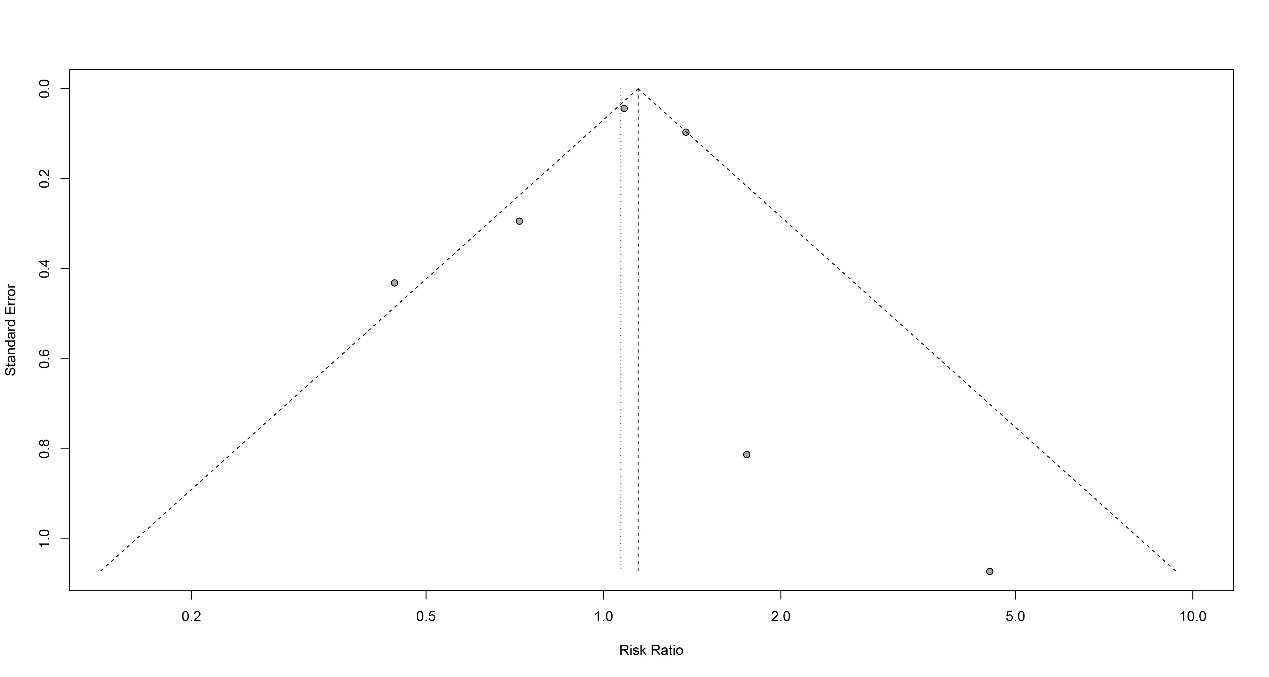


# Figure S4 A leave-one-out sensitivity analysis of this meta-analysis


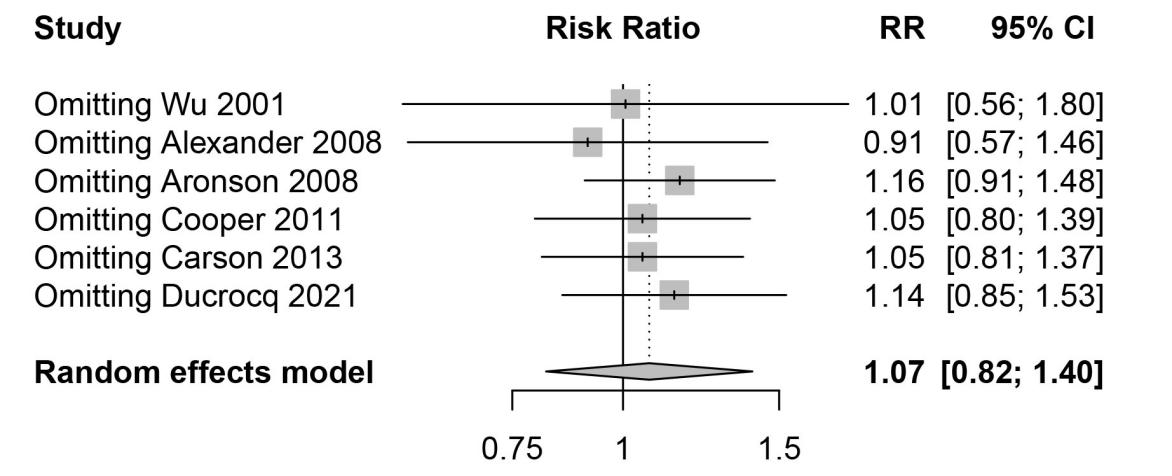

Supplement: Supplementary file 1 [file d9ab3021d7a2721404565d2e.docx]
